# Supplementary material for: Ischemic Etiology and Prognosis in Men and Women with Acute Heart Failure
Source: MDPI journal article supplement (doi:10.3390/jcm10081713), 2021-04-15
Supplement: s1 [file s1]

Supplementary materials:

# Ischemic etiology and prognosis in men and women with acute heart failure

Lourdes Vicent <sup>1</sup>, Jose Guerra <sup>2,3</sup>, Rafael Vazquez-García <sup>4</sup>, José R. Gonzalez-Juanatey <sup>3,5</sup>, Luis Martínez Dolz <sup>6</sup>, Javier Segovia <sup>3,7</sup>, Domingo Pascual-Figal <sup>8</sup>, Ramón Bover <sup>9</sup>, Fernando Worner <sup>10</sup>, Juan Delgado<sup>1,3</sup>, Francisco Fernández-Avilés <sup>3,11,12</sup> and Manuel Martínez-Sellés <sup>3,11,12,13,\*</sup>

<sup>1</sup> Cardiology Department, Hospital Universitario 12 de Octubre. Madrid, Spain.

<sup>2</sup> Cardiology Department, Hospital de la Santa Creu i Sant Pau, Barcelona. Spain

<sup>3</sup> CIBER de enfermedades cardiovasculares (CIBERCV), Instituto de Salud Carlos III. Spain.

<sup>4</sup> Cardiology Department, Puerta del Mar University Hospital, Cádiz. Spain

<sup>5</sup> Cardiology Department. University Hospital. Santiago de Compostela. Spain.

<sup>6</sup> Cardiology Department. University Hospital La Fe, Valencia. CIBER CV. Spain

<sup>7</sup> Cardiology Department, Hospital Universitario Puerta de Hierro Majadahonda, Madrid, Spain

<sup>8</sup> Cardiology Department, Hospital Virgen de la Arrixaca, Department of Medicine, University of Murcia, Murcia, Spain; <sup>9</sup> Centro Nacional de Investigaciones Cardiovasculares Carlos III (CNIC), Madrid, Spain

<sup>9</sup> Cardiology Department. Hospital Clínico San Carlos. Madrid. Spain

<sup>10</sup> Servicio de Cardiología. Hospital Universitari Arnau de Vilanova. IRBLLEIDA. Lleida. Spain.

<sup>11</sup> Cardiology Department, Instituto de Investigación. Hospital General Universitario Gregorio Marañón. Madrid, España

<sup>12</sup> Universidad Complutense. Madrid, Spain

<sup>13</sup> Universidad Europea. Madrid, Spain

\* Correspondence: mmselles@secardiologia.es; Tel.: +34-915-8686-87

**Table S1.** Basal demographic and clinical characteristics of patients with HF according to sex and etiology.

|                                   | Women<br>with<br>ischemic<br>etiology<br>(N= 167) | Women<br>with non-<br>ischemic<br>etiology<br>(N=1018) | P      | Men,<br>ischemic<br>HF<br>(N=446) | Men, non-<br>ischemic<br>HF (N=629) | P      |
|-----------------------------------|---------------------------------------------------|--------------------------------------------------------|--------|-----------------------------------|-------------------------------------|--------|
| Age (years)                       | 77.2±10.3                                         | 74.7±11.7                                              | 0.019  | 71.9±10.4                         | 69.4±13.3                           | <0.001 |
| Previous heart failure diagnosis  | 121 (72.5)                                        | 327 (55.5)                                             | <0.001 | 294 (65.9)                        | 318 (50.6)                          | 0.032  |
| Previous heart failure admissions | 84 (50.3)                                         | 220 (37.4)                                             | 0.002  | 206 (46.2)                        | 235 (37.4)                          | 0.003  |
| Tobacco use                       |                                                   |                                                        |        |                                   |                                     |        |
| - Smoker                          | 5 (3.0)                                           | 26 (4.4)                                               | 0.660  | 69 (15.5)                         | 93 (14.9)                           | 0.442  |
| - Former smoker                   | 17 (10.2)                                         | 54 (9.2)                                               | 0.685  | 252 (56.6)                        | 307 (49.1)                          | 0.421  |
| Alcohol consumption               | 1 (0.6)                                           | 10 (1.7)                                               | 0.241  | 53 (11.9)                         | 129 (20.5)                          | 0.178  |
| Dyslipidemia                      | 109 (65.3)                                        | 303 (51.4)                                             | 0.001  | 320 (71.8)                        | 280 (44.6)                          | 0.042  |
| Diabetes mellitus                 | 115 (68.9)                                        | 244 (41.4)                                             | <0.001 | 249 (55.8)                        | 239 (38.1)                          | <0.001 |
| Hypertension                      | 150 (89.8)                                        | 444 (75.4)                                             | <0.001 | 390 (87.4)                        | 430 (68.5)                          | <0.001 |

|                                                        |            |            |        |            |            |        |
|--------------------------------------------------------|------------|------------|--------|------------|------------|--------|
| Chronic kidney disease                                 |            |            |        |            |            |        |
| - GFR <30                                              | 15 (9.0)   | 25 (4.3)   | 0.010  | 34 (7.6)   | 24 (3.8)   | 0.032  |
| - GFR 30 - 59                                          | 42 (25.3)  | 108 (18.5) | 0.014  | 129 (28.9) | 123 (19.6) | 0.019  |
| <i>Chronic obstructive pulmonary disease</i>           | 8 (4.8)    | 53 (9.0)   | 0.150  | 94 (21.1)  | 135 (21.5) | 0.213  |
| Stroke                                                 | 17 (10.2)  | 52 (8.8)   | 0.785  | 50 (11.2)  | 64 (10.2)  | 0.452  |
| Peripheral arterial disease                            | 22 (13.2)  | 48 (8.2)   | 0.117  | 84 (18.8)  | 56 (8.9)   | 0.003  |
| Previous myocardial infarction                         | 117 (70.1) | 27 (4.6)   | <0.001 | 295 (66.1) | 45 (7.7)   | <0.001 |
| Previous coronary artery revascularization             |            |            |        |            |            |        |
| Percutaneous                                           | 61 (36.5)  | 24 (4.1)   |        | 166 (37.4) | 31 (5.0)   |        |
| Surgical                                               | 20 (12.0)  | 15 (2.6)   | <0.001 | 63 (14.2)  | 17 (2.7)   | <0.001 |
| Both                                                   | 9 (5.4)    | 7 (1.2)    |        | 45 (10.1)  | 8 (1.3)    |        |
| Atrial fibrillation                                    | 56 (33.5)  | 288 (28.3) | 0.043  | 145 (32.5) | 283 (45.0) | 0.021  |
| <i>Previous implantable cardioverter defibrillator</i> | 4 (2.4)    | 16 (2.7)   | 0.881  | 57 (12.8)  | 50 (8.0)   | 0.001  |
| Previous cardiac resynchronization therapy             | 3 (1.8)    | 10 (1.7)   | 0.904  | 21 (4.7)   | 17 (2.7)   | 0.152  |
| Previous treatments:                                   |            |            |        |            |            |        |
| - ACEIs                                                | 77 (46.1)  | 179 (30.4) | 0.001  | 213 (47.8) | 219 (34.9) | 0.001  |
| - ARBs                                                 | 50 (29.9)  | 156 (26.5) | 0.223  | 103 (23.1) | 135 (21.5) | 0.418  |
| - Betablockers                                         | 118 (70.7) | 282 (48.0) | <0.001 | 312 (70.1) | 281 (44.6) | <0.001 |
| - Ivabradine                                           | 9 (5.4)    | 13 (2.2)   | 0.132  | 43 (9.6)   | 22 (3.5)   | 0.218  |
| - Loop diuretics                                       | 104 (62.3) | 354 (60.1) | 0.337  | 287 (64.4) | 333 (53.0) | 0.319  |
| - Mineralocorticoid receptor antagonists               | 38 (22.8)  | 124 (21.1) | 0.136  | 144 (32.3) | 131 (20.8) | 0.113  |
| - Digoxin                                              | 12 (7.2)   | 85 (14.4)  | 0.032  | 35 (7.9)   | 66 (10.5)  | 0.027  |
| - Oral anticoagulation                                 | 51 (30.5)  | 275 (46.7) | 0.001  | 162 (36.5) | 232 (37.1) | 0.007  |
| Left ventricular ejection fraction (%)                 | 46.6±16.6  | 53.6±16.0  | <0.001 | 38.6±15.7  | 42.9±17.6  | 0.001  |
| Death during hospital admission                        | 8 (4.8)    | 20 (3.4)   | 0.227  | 18 (4.0)   | 25 (4.0)   | 0.616  |
| Hospital readmissions due to HF at 12 months           | 57 (34.1)  | 181 (30.7) | 0.406  | 146 (32.7) | 159 (25.3) | 0.009  |
| All-cause mortality at 12 months                       | 42 (25.2)  | 111 (18.9) | 0.081  | 102 (22.9) | 120 (19.1) | 0.131  |
| <i>Heart transplant at 12 months</i>                   | 1 (0.6)    | 4 (0.7)    | 0.528  | 13 (2.9)   | 18 (2.9)   | 0.959  |
| Sudden cardiac death at 12 months                      | 4 (2.4)    | 10 (1.7)   | 0.55   | 18 (4.0)   | 23 (3.7)   | 0.750  |

---

|                                       |           |           |       |           |          |       |
|---------------------------------------|-----------|-----------|-------|-----------|----------|-------|
| Death due to refractory heart failure | 19 (11.4) | 59 (10.0) | 0.665 | 52 (11.7) | 44 (7.0) | 0.009 |
| Death due to non-cardiac causes       | 13 (7.8)  | 25 (4.2)  | 0.072 | 24 (5.4)  | 36 (5.7) | 0.893 |
